# Supplementary material for: A unique porous architecture built by ultrathin wrinkled NiCoO2/rGO/NiCoO2 sandwich nanosheets for pseudocapacitance and Li ion storage
Source: Royal Society of Chemistry journal article supplement (doi:10.1039/c6ta03429b), 2016-01-01
Supplement: c6ta03429b1.pdf [file c6ta03429b1.pdf]

## Supporting Information

### **A unique porous architecture built by ultrathin wrinkled NiCoO<sub>2</sub>/rGO/NiCoO<sub>2</sub> sandwich nanosheets for pseudocapacitance and Li-ion storage**

Xuning Leng,<sup>a</sup> Yuan Shao,<sup>a</sup> Libo Wu,<sup>a</sup> Sufeng Wei,<sup>b</sup> Zhonghao Jiang,<sup>a</sup> Guoyong Wang,<sup>a\*</sup> Qing

Jiang,<sup>a</sup> and Jianshe Lian<sup>a</sup>

<sup>a</sup> Key Laboratory of Automobile Materials, Department of Materials Science and Engineering, Jilin

University, No. 5988 Renmin Street, Changchun 130025, PR China

<sup>b</sup> Key Laboratory of Advanced Structural Materials, Changchun University of Technology,

Changchun 130012, PR China

---

\*Corresponding author. E-mail: materwanggy@jlu.edu.cn; Tel: +86 431 85095875; Fax: +86 431 85095876.

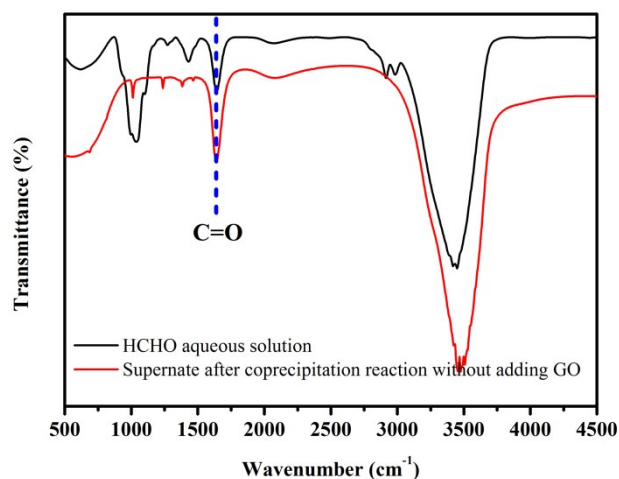

**Fig. S1** FTIR spectra of pure HCHO aqueous solution (the black curve) and supernate after the co-precipitation reaction at 90 °C for 6 h without GO (the red curve).

We have carefully investigated chemical state of the HMT solution during co-precipitation reaction without GO. After co-precipitation reaction at 90 °C for 6 h, HCHO was generated which is proved by the FTIR spectra. This demonstrates the hydrolysis of HMT which is described by the chemical equation (1). The generated HCHO can act as a strong reluctant under a condition of weak alkaline to reduce GO.

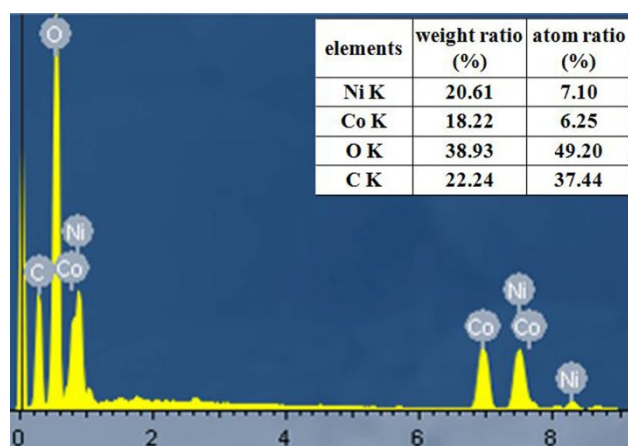

**Fig. S2** EDX spectrum of the NiCoO<sub>2</sub>/rGO/NiCoO<sub>2</sub> electrode composite and the inset is the table of elements ratio.

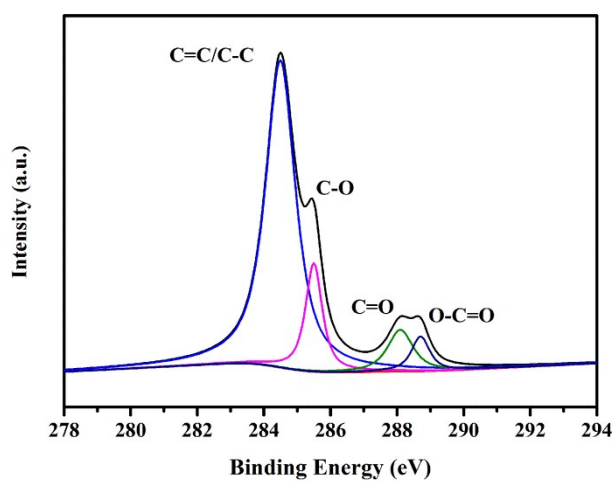

**Fig. S3** XPS spectra of C 1s of thermally reduced GO at 500 °C for 2 h in flowing N<sub>2</sub>.

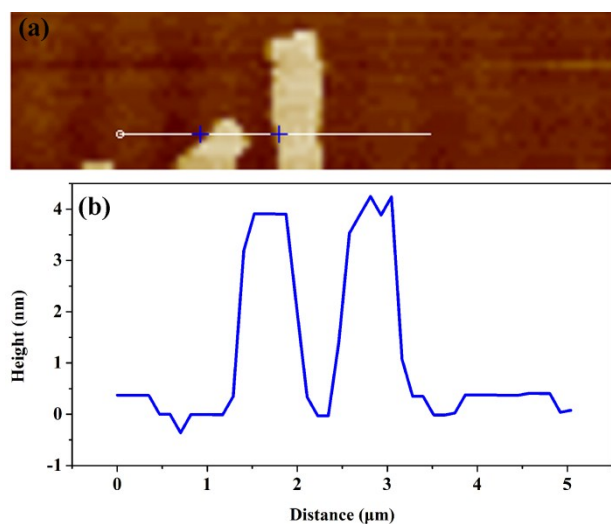

**Fig. S4** (a) AFM image of NiCoO<sub>2</sub> sheet; (b) the corresponding depth profiles of the white line on the image. The height difference of  $\sim 4$  nm, indicating the thickness of NiCoO<sub>2</sub> sheet is  $\sim 4$  nm.

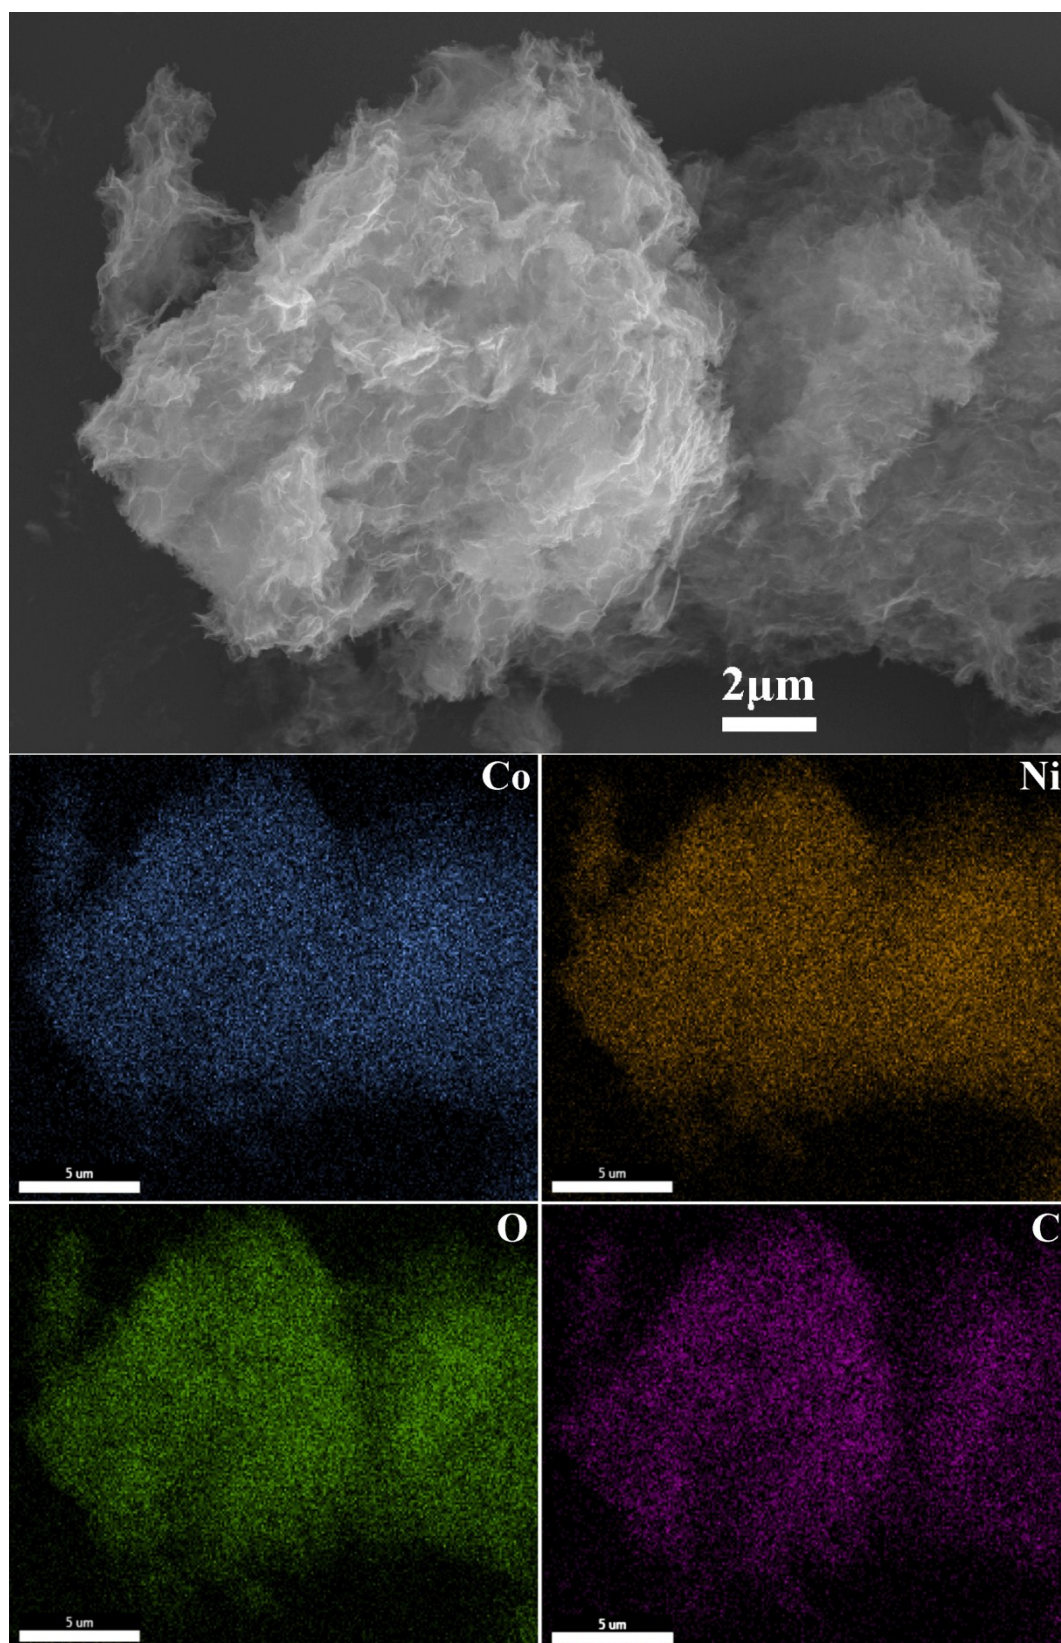

**Fig. S5** FESEM image of the  $\text{NiCoO}_2/\text{rGO}/\text{NiCoO}_2$  composite along with the corresponding elemental maps of Co, Ni, O, and C.



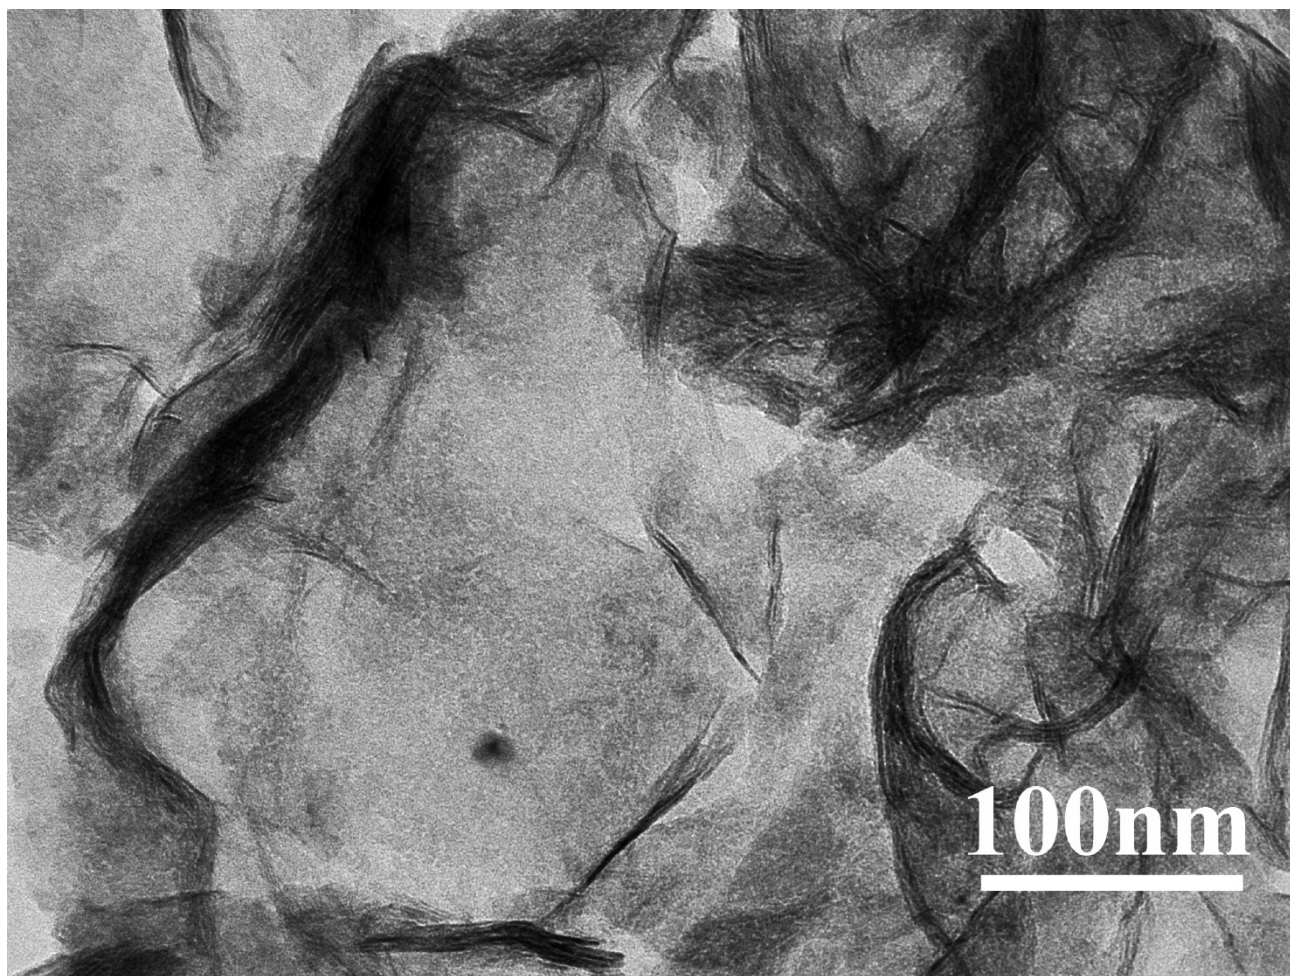

**Fig. S6** TEM image of the NiCoO<sub>2</sub>/rGO/NiCoO<sub>2</sub> composite.

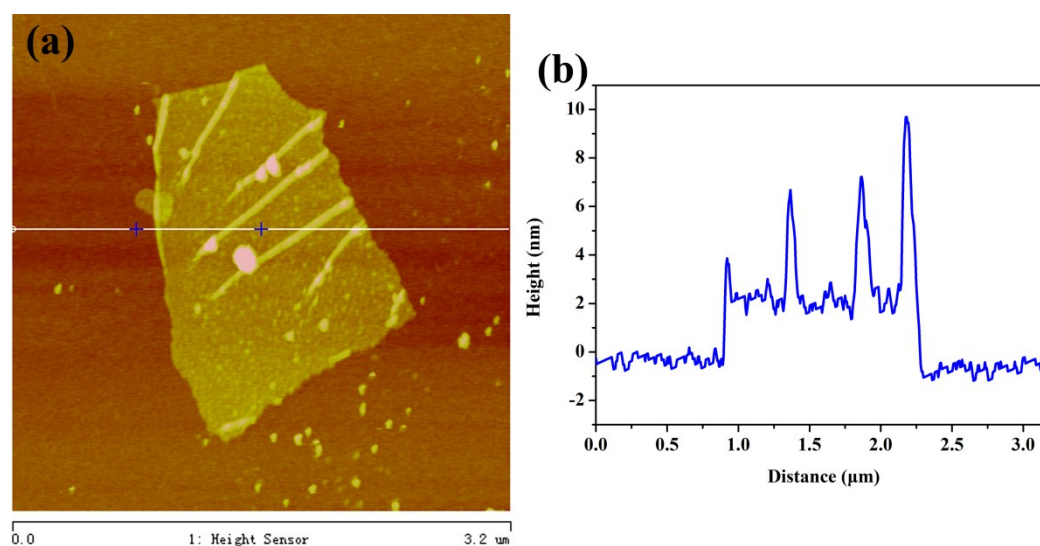

**Fig. S7** (a) AFM image of GO sheet; (b) the depth profile of the line of interest on the GO sheet. The height difference of  $\sim 2$  nm, and the height difference more than 2 nm can be attributed to the wrinkle.

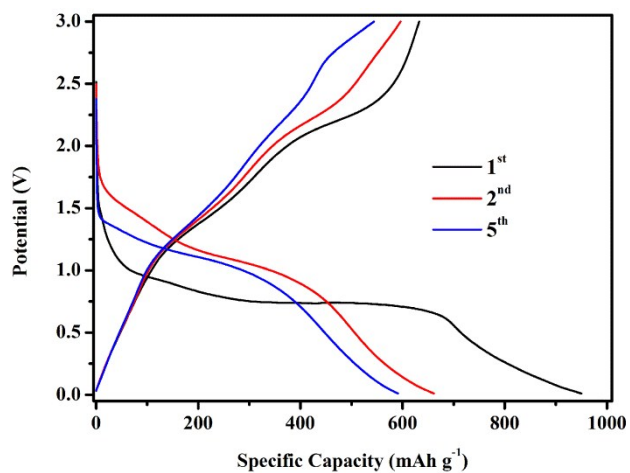

**Fig. S8** Representative charge/discharge voltage profiles at a current density of  $0.1 \text{ A g}^{-1}$  of the pure  $\text{NiCoO}_2$  electrode.

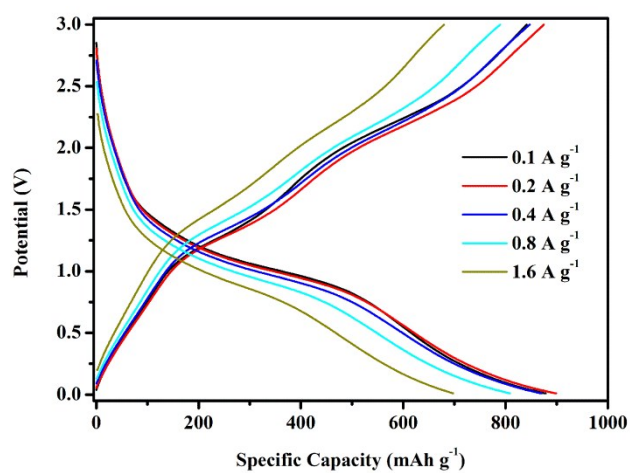

**Fig. S9** Representative charge/discharge curves at current densities from  $0.1$  to  $1.6 \text{ A g}^{-1}$  for the  $\text{NiCoO}_2/\text{rGO}/\text{NiCoO}_2$  electrode.



**Table S1.** Synthesis methods and electrochemical properties of typical Ni-Co-O based anodes for LIBs reported in previous literatures.

| Materials                      | Synthesis method         | Rate capacity                                       | cycling performance                                                             | Reference |
|--------------------------------|--------------------------|-----------------------------------------------------|---------------------------------------------------------------------------------|-----------|
| CoO@N-C nanocubes              | Hydrothermal             | 309 mA h g <sup>-1</sup> at 1 A g <sup>-1</sup>     | 598 mA h g <sup>-1</sup> in 50 <sup>th</sup> cycle at 0.1 A g <sup>-1</sup>     | Ref. [35] |
| CoO/graphene nanosheets        | Precipitation            | 531.2 mA h g <sup>-1</sup> at 1.6 A g <sup>-1</sup> | 1018 mA h g <sup>-1</sup> in 520 <sup>th</sup> cycle at 0.2 A g <sup>-1</sup>   | Ref. [20] |
| CoNiO <sub>2</sub> microflower | Hydrothermal             | 228.4 mA h g <sup>-1</sup> at 1 A g <sup>-1</sup>   | 397.4 mA h g <sup>-1</sup> in 110 <sup>th</sup> cycle at 0.1 A g <sup>-1</sup>  | Ref. [12] |
| NiCoO <sub>2</sub> /CNT        | Precipitation            | 933 mA h g <sup>-1</sup> at 0.8 A g <sup>-1</sup>   | ~ 750 mA h g <sup>-1</sup> in 150 <sup>th</sup> cycle at 0.4 A g <sup>-1</sup>  | Ref.[17]  |
| NiO-wrapped graphene           | Reflux                   | 403.3 mA h g <sup>-1</sup> at 1.6 A g <sup>-1</sup> | 704.8 mA h g <sup>-1</sup> in 50 <sup>th</sup> cycle at 0.2 A g <sup>-1</sup>   | Ref. [27] |
| NiO microspheres               | Thermal decomposition    | 621 mA h g <sup>-1</sup> at 1 A g <sup>-1</sup>     | 800 mA h g <sup>-1</sup> in 100 <sup>th</sup> cycle at 0.5 A g <sup>-1</sup>    | Ref. [46] |
| NiO <sub>x</sub> -carbon       | Electrospinning          | 423 mA h g <sup>-1</sup> at 1 A g <sup>-1</sup>     | 676 mA h g <sup>-1</sup> in 200 <sup>th</sup> cycle at 0.5 A g <sup>-1</sup>    | Ref. [47] |
| NiO nanofiber                  | Electrospinning          | 409 mA h g <sup>-1</sup> at 2 A g <sup>-1</sup>     | ~ 583 mA h g <sup>-1</sup> in 100 <sup>th</sup> cycle at 0.08 A g <sup>-1</sup> | Ref. [48] |
| CoO-G-C nanofiber mats         | Electrospinning          | 400 mA h g <sup>-1</sup> at 2 A g <sup>-1</sup>     | 690 mA h g <sup>-1</sup> in 352 <sup>nd</sup> cycle at 0.5 A g <sup>-1</sup>    | Ref. [49] |
| Mesoporous Co-Ni-O nanorod     | Microwave-irradiation    | 812 mA h g <sup>-1</sup> at 2 A g <sup>-1</sup>     | 656 mA h g <sup>-1</sup> in 500 <sup>th</sup> cycle at 5 A g <sup>-1</sup>      | Ref. [52] |
| Co doped NiO nanoflakes        | Chemical bath deposition | 471 mA h g <sup>-1</sup> at 2 A g <sup>-1</sup>     | 589.5 mA h g <sup>-1</sup> in 50 <sup>th</sup> cycle at 0.1 A g <sup>-1</sup>   | Ref. [50] |
| NiO hollow microspheres        | Soft-template            | 610 mA h g <sup>-1</sup> at 3.6 A g <sup>-1</sup>   | 393 mA h g <sup>-1</sup> in 50 <sup>th</sup> cycle at 0.2 A g <sup>-1</sup>     | Ref. [51] |
| rGO/NiCoO <sub>2</sub>         | Co-precipitation         | 706 mA h g <sup>-1</sup> At 1.6 A g <sup>-1</sup>   | 595 mA h g <sup>-1</sup> in 350 <sup>th</sup> cycle at 1 A g <sup>-1</sup>      | This work |
